# Supplementary material for: Evaluation of LD decay and various LD-decay estimators in simulated and SNP-array data of tetraploid potato
Source: PubMed Central journal article supplement (PMC5214954; doi:10.1007/s00122-016-2798-8), 2016-10-03

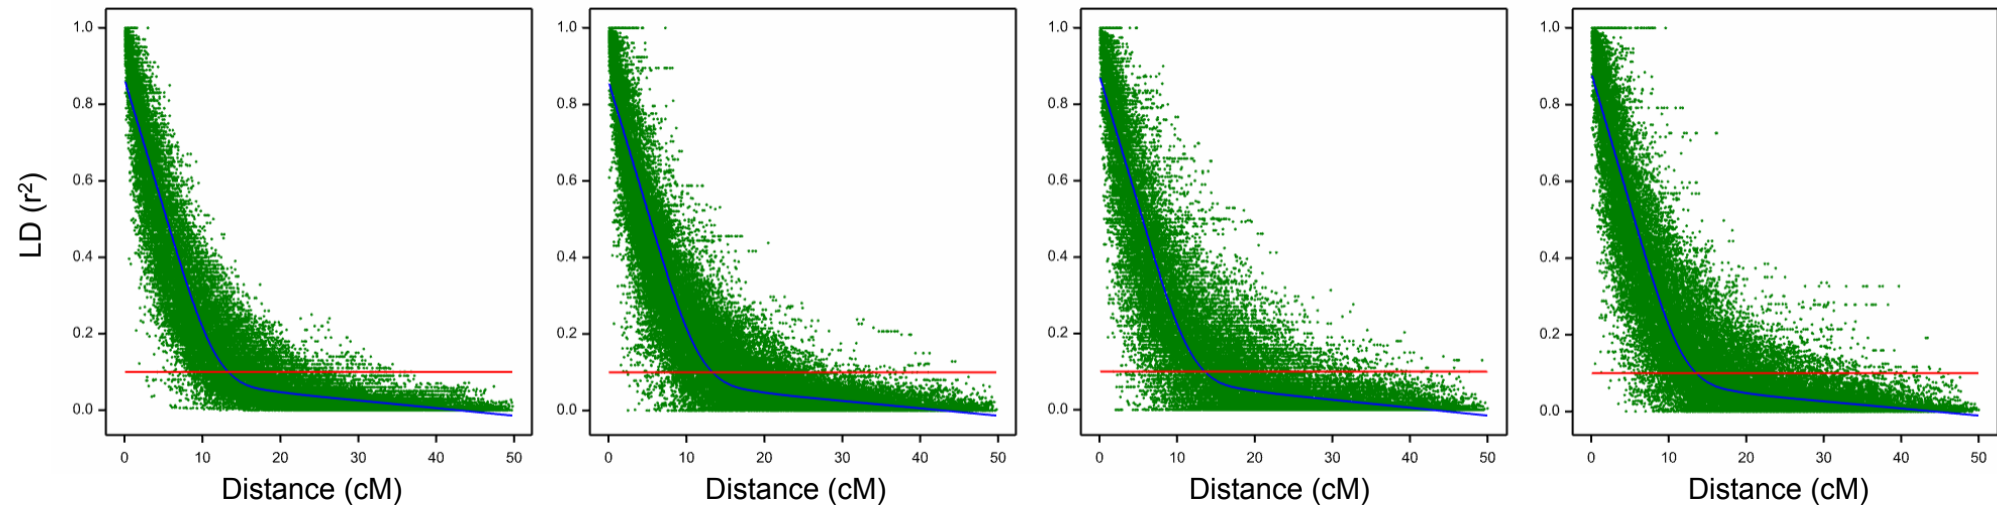

Supplement: 122_2016_2798_MOESM1_ESM.pdf [file 122_2016_2798_MOESM1_ESM.pdf]
